# Supplementary material
Source: publisher site journal article supplement (https://www.dovepress.com/article/612843)
Supplement: Supplementary file 1 [file 612843%20Supplementary%20Material.pdf]

Figure S1

(A)

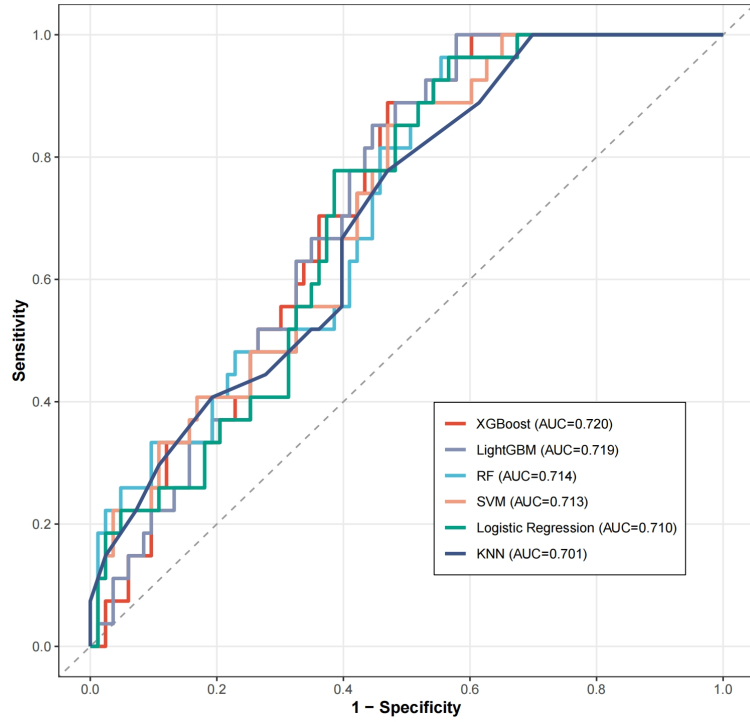

(B)

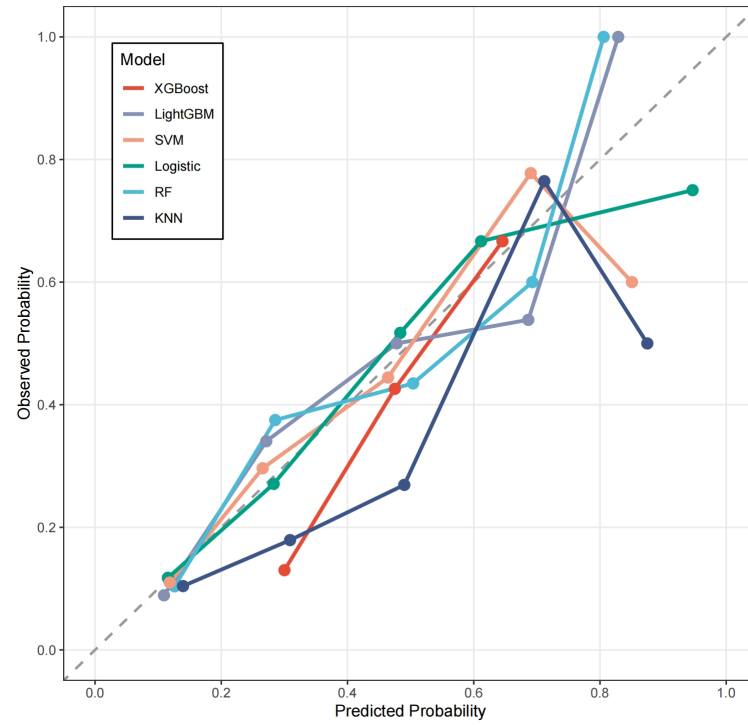

(C)

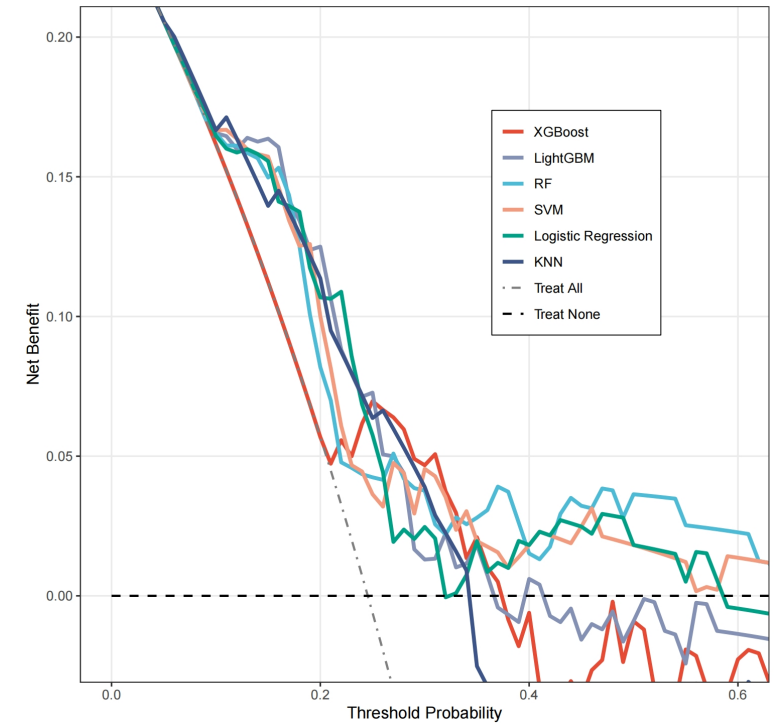

Table S1. TRIPOD+AI checklist

| Section/Topic             | Item | Development / evaluation <sup>1</sup> | Checklist item                                                                                                                                                                                                                               | Reported on page        |
|---------------------------|------|---------------------------------------|----------------------------------------------------------------------------------------------------------------------------------------------------------------------------------------------------------------------------------------------|-------------------------|
| <b>TITLE</b>              |      |                                       |                                                                                                                                                                                                                                              |                         |
| <i>Title</i>              | 1    | D;E                                   | Identify the study as developing or evaluating the performance of a multivariable prediction model, the target population, and the outcome to be predicted                                                                                   | Title                   |
| <b>ABSTRACT</b>           |      |                                       |                                                                                                                                                                                                                                              |                         |
| <i>Abstract</i>           | 2    | D;E                                   | See TRIPOD+AI for Abstracts checklist                                                                                                                                                                                                        | Abstract                |
| <b>INTRODUCTION</b>       |      |                                       |                                                                                                                                                                                                                                              |                         |
| <i>Background</i>         | 3a   | D;E                                   | Explain the healthcare context (including whether diagnostic or prognostic) and rationale for developing or evaluating the prediction model, including references to existing models                                                         | Paragraph 1-3           |
|                           | 3b   | D;E                                   | Describe the target population and the intended purpose of the prediction model in the context of the care pathway, including its intended users (e.g., healthcare professionals, patients, public)                                          | Paragraph 2-4           |
|                           | 3c   | D;E                                   | Describe any known health inequalities between sociodemographic groups                                                                                                                                                                       | Paragraph 4             |
| <i>Objectives</i>         | 4    | D;E                                   | Specify the study objectives, including whether the study describes the development or validation of a prediction model (or both)                                                                                                            | Paragraph 4             |
| <b>METHODS</b>            |      |                                       |                                                                                                                                                                                                                                              |                         |
| <i>Data</i>               | 5a   | D;E                                   | Describe the sources of data separately for the development and evaluation datasets (e.g., randomised trial, cohort, routine care or registry data), the rationale for using these data, and representativeness of the data                  | Study population        |
|                           | 5b   | D;E                                   | Specify the dates of the collected participant data, including start and end of participant accrual; and, if applicable, end of follow-up                                                                                                    | Study population        |
| <i>Participants</i>       | 6a   | D;E                                   | Specify key elements of the study setting (e.g., primary care, secondary care, general population) including the number and location of centres                                                                                              | Study population        |
|                           | 6b   | D;E                                   | Describe the eligibility criteria for study participants                                                                                                                                                                                     | Study population        |
|                           | 6c   | D;E                                   | Give details of any treatments received, and how they were handled during model development or evaluation, if relevant                                                                                                                       | Data collection         |
| <i>Data preparation</i>   | 7    | D;E                                   | Describe any data pre-processing and quality checking, including whether this was similar across relevant sociodemographic groups                                                                                                            | preprocessing of data   |
| <i>Outcome</i>            | 8a   | D;E                                   | Clearly define the outcome that is being predicted and the time horizon, including how and when assessed, the rationale for choosing this outcome, and whether the method of outcome assessment is consistent across sociodemographic groups | Outcome Measures        |
|                           | 8b   | D;E                                   | If outcome assessment requires subjective interpretation, describe the qualifications and demographic characteristics of the outcome assessors                                                                                               |                         |
|                           | 8c   | D;E                                   | Report any actions to blind assessment of the outcome to be predicted                                                                                                                                                                        |                         |
| <i>Predictors</i>         | 9a   | D                                     | Describe the choice of initial predictors (e.g., literature, previous models, all available predictors) and any pre-selection of predictors before model building                                                                            | Feature Selection       |
|                           | 9b   | D;E                                   | Clearly define all predictors, including how and when they were measured (and any actions to blind assessment of predictors for the outcome and other predictors)                                                                            | Feature Selection       |
|                           | 9c   | D;E                                   | If predictor measurement requires subjective interpretation, describe the qualifications and demographic characteristics of the predictor assessors                                                                                          |                         |
| <i>Sample size</i>        | 10   | D;E                                   | Explain how the study size was arrived at (separately for development and evaluation), and justify that the study size was sufficient to answer the research question. Include details of any sample size calculation                        | Patient characteristics |
| <i>Missing data</i>       | 11   | D;E                                   | Describe how missing data were handled. Provide reasons for omitting any data                                                                                                                                                                | Data collection         |
| <i>Analytical methods</i> | 12a  | D                                     | Describe how the data were used (e.g., for development and evaluation of model performance) in the analysis, including whether the data were partitioned, considering any sample size requirements                                           | Model development       |
|                           | 12b  | D                                     | Depending on the type of model, describe how predictors were handled in the analyses (functional form, rescaling, transformation, or any standardisation).                                                                                   | Model development       |
|                           | 12c  | D                                     | Specify the type of model, rationale <sup>2</sup> , all model-building steps, including any hyperparameter tuning, and method for internal validation                                                                                        | Model development       |
|                           | 12d  | D;E                                   | Describe if and how any heterogeneity in estimates of model parameter values and model performance was handled and quantified across clusters (e.g., hospitals, countries). See TRIPOD-Cluster for additional considerations <sup>3</sup>    |                         |
|                           | 12e  | D;E                                   | Specify all measures and plots used (and their rationale) to evaluate model performance (e.g., discrimination, calibration, clinical utility) and, if relevant, to compare multiple models                                                   | Model performance       |
|                           | 12f  | E                                     | Describe any model updating (e.g., recalibration) arising from the model evaluation, either overall or for particular sociodemographic groups or settings                                                                                    |                         |
|                           | 12g  | E                                     | For model evaluation, describe how the model predictions were calculated (e.g., formula, code, object, application programming interface)                                                                                                    | Model performance       |
| <i>Class imbalance</i>    | 13   | D;E                                   | If class imbalance methods were used, state why and how this was done, and any subsequent methods to recalibrate the model or the model predictions                                                                                          |                         |
| <i>Fairness</i>           | 14   | D;E                                   | Describe any approaches that were used to address model fairness and their rationale                                                                                                                                                         |                         |
| <i>Model output</i>       | 15   | D                                     | Specify the output of the prediction model (e.g., probabilities, classification). Provide details and rationale for any classification and how the thresholds were identified                                                                | Model performance       |

|                                                              |     |     |                                                                                                                                                                                                                                                                                                                                                    |                       |
|--------------------------------------------------------------|-----|-----|----------------------------------------------------------------------------------------------------------------------------------------------------------------------------------------------------------------------------------------------------------------------------------------------------------------------------------------------------|-----------------------|
| <i>Training versus evaluation</i>                            | 16  | D;E | Identify any differences between the development and evaluation data in healthcare setting, eligibility criteria, outcome, and predictors                                                                                                                                                                                                          |                       |
| <i>Ethical approval</i>                                      | 17  | D;E | Name the institutional research board or ethics committee that approved the study and describe the participant-informed consent or the ethics committee waiver of informed consent                                                                                                                                                                 | Ethics                |
| <b>OPEN SCIENCE</b>                                          |     |     |                                                                                                                                                                                                                                                                                                                                                    |                       |
| <i>Funding</i>                                               | 18a | D;E | Give the source of funding and the role of the funders for the present study                                                                                                                                                                                                                                                                       | Funding               |
| <i>Conflicts of interest</i>                                 | 18b | D;E | Declare any conflicts of interest and financial disclosures for all authors                                                                                                                                                                                                                                                                        | conflicts of interest |
| <i>Protocol</i>                                              | 18c | D;E | Indicate where the study protocol can be accessed or state that a protocol was not prepared                                                                                                                                                                                                                                                        |                       |
| <i>Registration</i>                                          | 18d | D;E | Provide registration information for the study, including register name and registration number, or state that the study was not registered                                                                                                                                                                                                        |                       |
| <i>Data sharing</i>                                          | 18e | D;E | Provide details of the availability of the study data                                                                                                                                                                                                                                                                                              |                       |
| <i>Code sharing</i>                                          | 18f | D;E | Provide details of the availability of the analytical code <sup>4</sup>                                                                                                                                                                                                                                                                            |                       |
| <b>PATIENT &amp; PUBLIC INVOLVEMENT</b>                      |     |     |                                                                                                                                                                                                                                                                                                                                                    |                       |
| <i>Patient &amp; Public Involvement</i>                      | 19  | D;E | Provide details of any patient and public involvement during the design, conduct, reporting, interpretation, or dissemination of the study or state no involvement.                                                                                                                                                                                |                       |
| <b>RESULTS</b>                                               |     |     |                                                                                                                                                                                                                                                                                                                                                    |                       |
| <i>Participants</i>                                          | 20a | D;E | Describe the flow of participants through the study, including the number of participants with and without the outcome and, if applicable, a summary of the follow-up time. A diagram may be helpful.                                                                                                                                              | Figure 1              |
|                                                              | 20b | D;E | Report the characteristics overall and, where applicable, for each data source or setting, including the key dates, key predictors (including demographics), treatments received, sample size, number of outcome events, follow-up time, and amount of missing data. A table may be helpful. Report any differences across key demographic groups. | Table 1               |
|                                                              | 20c | E   | For model evaluation, show a comparison with the development data of the distribution of important predictors (demographics, predictors, and outcome).                                                                                                                                                                                             | Table 1               |
| <i>Model development</i>                                     | 21  | D;E | Specify the number of participants and outcome events in each analysis (e.g., for model development, hyperparameter tuning, model evaluation)                                                                                                                                                                                                      | Paragraph 1           |
| <i>Model specification</i>                                   | 22  | D   | Provide details of the full prediction model (e.g., formula, code, object, application programming interface) to allow predictions in new individuals and to enable third-party evaluation and implementation, including any restrictions to access or re-use (e.g., freely available, proprietary) <sup>5</sup>                                   |                       |
| <i>Model performance</i>                                     | 23a | D;E | Report model performance estimates with confidence intervals, including for any key subgroups (e.g., sociodemographic). Consider plots to aid presentation.                                                                                                                                                                                        | Table 2,3/Fig 3       |
|                                                              | 23b | D;E | If examined, report results of any heterogeneity in model performance across clusters. See TRIPOD Cluster for additional details <sup>3</sup> .                                                                                                                                                                                                    |                       |
| <i>Model updating</i>                                        | 24  | E   | Report the results from any model updating, including the updated model and subsequent performance                                                                                                                                                                                                                                                 |                       |
| <b>DISCUSSION</b>                                            |     |     |                                                                                                                                                                                                                                                                                                                                                    |                       |
| <i>Interpretation</i>                                        | 25  | D;E | Give an overall interpretation of the main results, including issues of fairness in the context of the objectives and previous studies                                                                                                                                                                                                             | Paragraph 1-2         |
| <i>Limitations</i>                                           | 26  | D;E | Discuss any limitations of the study (such as a non-representative sample, sample size, overfitting, missing data) and their effects on any biases, statistical uncertainty, and generalizability                                                                                                                                                  | Paragraph 4           |
| <i>Usability of the model in the context of current care</i> | 27a | D   | Describe how poor quality or unavailable input data (e.g., predictor values) should be assessed and handled when implementing the prediction model                                                                                                                                                                                                 |                       |
|                                                              | 27b | D   | Specify whether users will be required to interact in the handling of the input data or use of the model, and what level of expertise is required of users                                                                                                                                                                                         | Paragraph 3           |
|                                                              | 27c | D;E | Discuss any next steps for future research, with a specific view to applicability and generalizability of the model                                                                                                                                                                                                                                | Paragraph 4           |

Table S2. Summary of missing values

| Variables              | Data types  | Missing values, n (%) |
|------------------------|-------------|-----------------------|
| AKI                    | Categorical | 0 (0)                 |
| Sex                    | Categorical | 0 (0)                 |
| Insulin                | Categorical | 0 (0)                 |
| ACEI_ARB               | Categorical | 0 (0)                 |
| Hypertension           | Categorical | 0 (0)                 |
| Diabetes               | Categorical | 0 (0)                 |
| Coronary_Heart_Disease | Categorical | 0 (0)                 |
| Cerebral_Infarction    | Categorical | 0 (0)                 |
| Kidney_Disease         | Categorical | 0 (0)                 |
| Thrombosis             | Categorical | 0 (0)                 |
| Emphysema              | Categorical | 0 (0)                 |
| Bronchitis             | Categorical | 0 (0)                 |
| Heart_Failure          | Categorical | 0 (0)                 |
| General_Anesthesia     | Categorical | 0 (0)                 |
| ASA_12                 | Categorical | 0 (0)                 |
| ASA_3                  | Categorical | 0 (0)                 |
| Colloid_Use            | Categorical | 0 (0)                 |
| Vasopressor_Use        | Categorical | 0 (0)                 |
| Antihypertensive_Use   | Categorical | 0 (0)                 |
| Glucocorticoid_Use     | Categorical | 0 (0)                 |
| Dexmedetomidine        | Categorical | 0 (0)                 |
| Rocuronium             | Categorical | 0 (0)                 |
| Atracurium             | Categorical | 0 (0)                 |
| Ketamine               | Categorical | 0 (0)                 |
| Epinephrine            | Categorical | 0 (0)                 |
| Norepinephrine         | Categorical | 0 (0)                 |
| Dopamine               | Categorical | 0 (0)                 |
| Dobutamine             | Categorical | 0 (0)                 |
| Ephedrine              | Categorical | 0 (0)                 |
| Atropine               | Categorical | 0 (0)                 |
| Phenylephrine          | Categorical | 0 (0)                 |
| Metaraminol            | Categorical | 0 (0)                 |
| Esmolol                | Categorical | 0 (0)                 |
| Nicardipine            | Categorical | 0 (0)                 |
| Nitroglycerin          | Categorical | 0 (0)                 |
| Methylprednisolone     | Categorical | 0 (0)                 |
| Dexamethasone          | Categorical | 0 (0)                 |
| Mannitol               | Categorical | 0 (0)                 |
| Human_Albumin_Infusion | Categorical | 0 (0)                 |
| RBC_Transfusion        | Categorical | 0 (0)                 |

|                             |             |            |
|-----------------------------|-------------|------------|
| Cryoprecipitate             | Categorical | 0 (0)      |
| Succinylated_Gelatin        | Categorical | 0 (0)      |
| Hydroxyethyl_Starch         | Categorical | 0 (0)      |
| Cardiac_Output_Monitoring   | Categorical | 0 (0)      |
| Anesthetic_Depth_Monitoring | Categorical | 0 (0)      |
| Arterial_Puncture           | Categorical | 0 (0)      |
| Age                         | Continuous  | 0 (0)      |
| Uric_Acid                   | Continuous  | 0 (0)      |
| Urea                        | Continuous  | 29 (4.0)   |
| ALT                         | Continuous  | 0 (0)      |
| AST                         | Continuous  | 0 (0)      |
| ALT_AST                     | Continuous  | 0 (0)      |
| PLR                         | Continuous  | 0 (0)      |
| NLR                         | Continuous  | 0 (0)      |
| SII                         | Continuous  | 0 (0)      |
| Direct_Bilirubin            | Continuous  | 0 (0)      |
| Total_Bilirubin             | Continuous  | 0 (0)      |
| Albumin                     | Continuous  | 0 (0)      |
| Potassium                   | Continuous  | 0 (0)      |
| Sodium                      | Continuous  | 0 (0)      |
| Calcium                     | Continuous  | 5 (0.7)    |
| Cystatin_C                  | Continuous  | 97 (13.2)  |
| Lymphocyte                  | Continuous  | 0 (0)      |
| Neutrophil                  | Continuous  | 0 (0)      |
| Eosinophil                  | Continuous  | 0 (0)      |
| RBC                         | Continuous  | 0 (0)      |
| Hematocrit                  | Continuous  | 0 (0)      |
| Hemoglobin                  | Continuous  | 0 (0)      |
| Platelet                    | Continuous  | 0 (0)      |
| PT                          | Continuous  | 5 (0.7)    |
| APTT                        | Continuous  | 7 (1.0)    |
| Lactate                     | Continuous  | 85 (11.6)  |
| HCO3                        | Continuous  | 101 (13.8) |
| pH                          | Continuous  | 77 (10.5)  |
| PaO2                        | Continuous  | 81 (11.1)  |
| PaCO2                       | Continuous  | 79 (10.8)  |
| Surgical_Duration           | Continuous  | 10 (1.4)   |
| Anesthesia_Duration         | Continuous  | 21 (2.9)   |
| Blood_Loss                  | Continuous  | 108 (14.7) |
| Total_Output                | Continuous  | 30 (4.1)   |
| Transfusion_Volume          | Continuous  | 0 (0)      |
| Crystalloid_Volume          | Continuous  | 34 (4.6)   |
| Total_Input                 | Continuous  | 0 (0)      |
| Hypotension_Duration        | Continuous  | 0 (0)      |

|                         |            |       |
|-------------------------|------------|-------|
| Hypothermia_Duration    | Continuous | 0 (0) |
| Low_SpO2_Duration       | Continuous | 0 (0) |
| Tachycardia_Duration    | Continuous | 0 (0) |
| Preoperative_Creatinine | Continuous | 0 (0) |
| eGFR                    | Continuous | 0 (0) |

Table S3. Baseline characteristics and outcomes of the patients in train set

| Variables                     | Total (n = 437) | 0 (n = 332) | 1 (n = 105) | p       |
|-------------------------------|-----------------|-------------|-------------|---------|
| Sex, n (%)                    |                 |             |             | 0.101   |
| 0                             | 164 (38)        | 117 (35)    | 47 (45)     |         |
| 1                             | 273 (62)        | 215 (65)    | 58 (55)     |         |
| Insulin, n (%)                |                 |             |             | 0.087   |
| 0                             | 374 (86)        | 290 (87)    | 84 (80)     |         |
| 1                             | 63 (14)         | 42 (13)     | 21 (20)     |         |
| ACEI_ARB, n (%)               |                 |             |             | 0.579   |
| 0                             | 309 (71)        | 232 (70)    | 77 (73)     |         |
| 1                             | 128 (29)        | 100 (30)    | 28 (27)     |         |
| Hypertension, n (%)           |                 |             |             | 0.879   |
| 0                             | 213 (49)        | 163 (49)    | 50 (48)     |         |
| 1                             | 224 (51)        | 169 (51)    | 55 (52)     |         |
| Diabetes, n (%)               |                 |             |             | 0.468   |
| 0                             | 338 (77)        | 260 (78)    | 78 (74)     |         |
| 1                             | 99 (23)         | 72 (22)     | 27 (26)     |         |
| Coronary_Heart_Disease, n (%) |                 |             |             | 0.437   |
| 0                             | 250 (57)        | 186 (56)    | 64 (61)     |         |
| 1                             | 187 (43)        | 146 (44)    | 41 (39)     |         |
| Cerebral_Infarction, n (%)    |                 |             |             | 0.498   |
| 0                             | 377 (86)        | 289 (87)    | 88 (84)     |         |
| 1                             | 60 (14)         | 43 (13)     | 17 (16)     |         |
| Kidney_Disease, n (%)         |                 |             |             | < 0.001 |
| 0                             | 394 (90)        | 311 (94)    | 83 (79)     |         |
| 1                             | 43 (10)         | 21 (6)      | 22 (21)     |         |
| Thrombosis, n (%)             |                 |             |             | 0.232   |
| 0                             | 421 (96)        | 322 (97)    | 99 (94)     |         |
| 1                             | 16 (4)          | 10 (3)      | 6 (6)       |         |
| Emphysema, n (%)              |                 |             |             | 1       |
| 0                             | 408 (93)        | 310 (93)    | 98 (93)     |         |
| 1                             | 29 (7)          | 22 (7)      | 7 (7)       |         |
| Bronchitis, n (%)             |                 |             |             | 0.833   |
| 0                             | 408 (93)        | 309 (93)    | 99 (94)     |         |
| 1                             | 29 (7)          | 23 (7)      | 6 (6)       |         |
| Heart_Failure, n (%)          |                 |             |             | 0.989   |
| 0                             | 289 (66)        | 219 (66)    | 70 (67)     |         |
| 1                             | 148 (34)        | 113 (34)    | 35 (33)     |         |
| General_Anesthesia, n (%)     |                 |             |             | 0.418   |
| 0                             | 21 (5)          | 18 (5)      | 3 (3)       |         |

|                             |   |          |          |          |       |
|-----------------------------|---|----------|----------|----------|-------|
| ASA_12, n (%)               | 1 | 416 (95) | 314 (95) | 102 (97) | 0.687 |
|                             | 0 | 415 (95) | 314 (95) | 101 (96) |       |
| ASA_3, n (%)                | 1 | 22 (5)   | 18 (5)   | 4 (4)    | 0.095 |
|                             | 0 | 196 (45) | 141 (42) | 55 (52)  |       |
| Colloid_Use, n (%)          | 1 | 241 (55) | 191 (58) | 50 (48)  | 0.003 |
|                             | 0 | 302 (69) | 242 (73) | 60 (57)  |       |
| Vasopressor_Use, n (%)      | 1 | 135 (31) | 90 (27)  | 45 (43)  | 0.282 |
|                             | 0 | 20 (5)   | 13 (4)   | 7 (7)    |       |
| Antihypertensive_Use, n (%) | 1 | 417 (95) | 319 (96) | 98 (93)  | 0.319 |
|                             | 0 | 342 (78) | 264 (80) | 78 (74)  |       |
| Glucocorticoid_Use, n (%)   | 1 | 95 (22)  | 68 (20)  | 27 (26)  | 0.003 |
|                             | 0 | 360 (82) | 284 (86) | 76 (72)  |       |
| Dexmedetomidine, n (%)      | 1 | 77 (18)  | 48 (14)  | 29 (28)  | 0.14  |
|                             | 0 | 375 (86) | 290 (87) | 85 (81)  |       |
| Rocuronium, n (%)           | 1 | 62 (14)  | 42 (13)  | 20 (19)  | 0.119 |
|                             | 0 | 408 (93) | 306 (92) | 102 (97) |       |
| Atracurium, n (%)           | 1 | 29 (7)   | 26 (8)   | 3 (3)    | 0.944 |
|                             | 0 | 76 (17)  | 57 (17)  | 19 (18)  |       |
| Ketamine, n (%)             | 1 | 361 (83) | 275 (83) | 86 (82)  | 1     |
|                             | 0 | 432 (99) | 328 (99) | 104 (99) |       |
| Epinephrine, n (%)          | 1 | 5 (1)    | 4 (1)    | 1 (1)    | 0.023 |
|                             | 0 | 50 (11)  | 31 (9)   | 19 (18)  |       |
| Norepinephrine, n (%)       | 1 | 387 (89) | 301 (91) | 86 (82)  | 0.155 |
|                             | 0 | 48 (11)  | 32 (10)  | 16 (15)  |       |
| Dopamine, n (%)             | 1 | 389 (89) | 300 (90) | 89 (85)  | 0.124 |
|                             | 0 | 411 (94) | 316 (95) | 95 (90)  |       |

|                               |   |          |          |          |         |
|-------------------------------|---|----------|----------|----------|---------|
|                               | 1 | 26 (6)   | 16 (5)   | 10 (10)  |         |
| Dobutamine, n (%)             |   |          |          |          | 0.051   |
|                               | 0 | 82 (19)  | 55 (17)  | 27 (26)  |         |
|                               | 1 | 355 (81) | 277 (83) | 78 (74)  |         |
| Ephedrine, n (%)              |   |          |          |          | 0.246   |
|                               | 0 | 307 (70) | 228 (69) | 79 (75)  |         |
|                               | 1 | 130 (30) | 104 (31) | 26 (25)  |         |
| Atropine, n (%)               |   |          |          |          | 0.018   |
|                               | 0 | 121 (28) | 82 (25)  | 39 (37)  |         |
|                               | 1 | 316 (72) | 250 (75) | 66 (63)  |         |
| Phenylephrine, n (%)          |   |          |          |          | 0.803   |
|                               | 0 | 343 (78) | 262 (79) | 81 (77)  |         |
|                               | 1 | 94 (22)  | 70 (21)  | 24 (23)  |         |
| Metaraminol, n (%)            |   |          |          |          | 0.597   |
|                               | 0 | 391 (89) | 299 (90) | 92 (88)  |         |
|                               | 1 | 46 (11)  | 33 (10)  | 13 (12)  |         |
| Esmolol, n (%)                |   |          |          |          | 0.97    |
|                               | 0 | 402 (92) | 306 (92) | 96 (91)  |         |
|                               | 1 | 35 (8)   | 26 (8)   | 9 (9)    |         |
| Nicardipine, n (%)            |   |          |          |          | 0.771   |
|                               | 0 | 421 (96) | 319 (96) | 102 (97) |         |
|                               | 1 | 16 (4)   | 13 (4)   | 3 (3)    |         |
| Nitroglycerin, n (%)          |   |          |          |          | 0.604   |
|                               | 0 | 383 (88) | 293 (88) | 90 (86)  |         |
|                               | 1 | 54 (12)  | 39 (12)  | 15 (14)  |         |
| Methylprednisolone, n (%)     |   |          |          |          | < 0.001 |
|                               | 0 | 383 (88) | 303 (91) | 80 (76)  |         |
|                               | 1 | 54 (12)  | 29 (9)   | 25 (24)  |         |
| Dexamethasone, n (%)          |   |          |          |          | 1       |
|                               | 0 | 409 (94) | 311 (94) | 98 (93)  |         |
|                               | 1 | 28 (6)   | 21 (6)   | 7 (7)    |         |
| Mannitol, n (%)               |   |          |          |          | 0.036   |
|                               | 0 | 392 (90) | 304 (92) | 88 (84)  |         |
|                               | 1 | 45 (10)  | 28 (8)   | 17 (16)  |         |
| Human_Albumin_Infusion, n (%) |   |          |          |          | 0.282   |
|                               | 0 | 417 (95) | 319 (96) | 98 (93)  |         |
|                               | 1 | 20 (5)   | 13 (4)   | 7 (7)    |         |
| RBC_Transfusion, n (%)        |   |          |          |          | 0.044   |
|                               | 0 | 341 (78) | 267 (80) | 74 (70)  |         |

|                                    |   |                         |                        |                          |       |
|------------------------------------|---|-------------------------|------------------------|--------------------------|-------|
| Cryoprecipitate, n (%)             | 1 | 96 (22)                 | 65 (20)                | 31 (30)                  | 0.319 |
|                                    | 0 | 424 (97)                | 324 (98)               | 100 (95)                 |       |
| Succinylated_Gelatin, n (%)        | 1 | 13 (3)                  | 8 (2)                  | 5 (5)                    | 0.003 |
|                                    | 0 | 311 (71)                | 249 (75)               | 62 (59)                  |       |
| Hydroxyethyl_Starch, n (%)         | 1 | 126 (29)                | 83 (25)                | 43 (41)                  | 0.213 |
|                                    | 0 | 422 (97)                | 323 (97)               | 99 (94)                  |       |
| Cardiac_Output_Monitoring, n (%)   | 1 | 15 (3)                  | 9 (3)                  | 6 (6)                    | 0.012 |
|                                    | 0 | 75 (17)                 | 48 (14)                | 27 (26)                  |       |
| Anesthetic_Depth_Monitoring, n (%) | 1 | 362 (83)                | 284 (86)               | 78 (74)                  | 0.486 |
|                                    | 0 | 354 (81)                | 266 (80)               | 88 (84)                  |       |
| Arterial_Puncture, n (%)           | 1 | 83 (19)                 | 66 (20)                | 17 (16)                  | 0.018 |
|                                    | 0 | 56 (13)                 | 35 (11)                | 21 (20)                  |       |
| Age, Median (Q1,Q3)                | 1 | 381 (87)                | 297 (89)               | 84 (80)                  | 0.286 |
|                                    |   | 72 (69, 76)             | 72 (69, 76)            | 71 (69, 74)              |       |
| Urea, Median (Q1,Q3)               |   | 6.3 (5, 8.1)            | 6.4 (5, 8.22)          | 6.1 (4.8, 8)             | 0.464 |
| ALT, Median (Q1,Q3)                |   | 16 (12, 27)             | 16 (11, 26)            | 19 (12.5, 31)            | 0.01  |
| AST, Median (Q1,Q3)                |   | 21 (16, 28)             | 20 (16, 27)            | 22 (17, 34)              | 0.027 |
| ALT_AST, Median (Q1,Q3)            |   | 0.79 (0.62, 1.08)       | 0.78 (0.63, 1.06)      | 0.8 (0.61, 1.14)         | 0.412 |
| PLR, Median (Q1,Q3)                |   | 123.31 (91.63, 163.89)  | 122.54 (91.92, 158.38) | 126.35 (90.93, 171.62)   | 0.548 |
| NLR, Median (Q1,Q3)                |   | 2.37 (1.68, 3.91)       | 2.33 (1.69, 3.47)      | 2.65 (1.67, 5.6)         | 0.011 |
| SII, Median (Q1,Q3)                |   | 488.72 (319.25, 799.49) | 468.99 (311.6, 742.67) | 543.21 (345.09, 1187.02) | 0.045 |
| Direct_Bilirubin, Median (Q1,Q3)   |   | 4.3 (3, 6.1)            | 4.15 (3, 6)            | 4.7 (3, 6.2)             | 0.214 |
| Total_Bilirubin,                   |   | 11.1 (7.8, 15.1)        | 10.8 (7.68,            | 11.7 (8.5, 15.3)         | 0.119 |

|                                   |                   |                       |                      |         |
|-----------------------------------|-------------------|-----------------------|----------------------|---------|
| Median (Q1,Q3)                    |                   | 14.95)                |                      |         |
| Albumin, Median (Q1,Q3)           | 37.9 (35.5, 40.5) | 38.1 (35.58, 40.92)   | 37.5 (34.9, 39.7)    | 0.058   |
| Potassium, Mean ± SD              | 4.05 ± 0.39       | 4.06 ± 0.39           | 4.01 ± 0.4           | 0.286   |
| Sodium, Median (Q1,Q3)            | 140 (138, 142)    | 140 (139, 142)        | 140 (138, 142)       | 0.241   |
| Calcium, Median (Q1,Q3)           | 2.24 (2.17, 2.31) | 2.25 (2.18, 2.31)     | 2.23 (2.14, 2.31)    | 0.115   |
| Cystatin_C, Median (Q1,Q3)        | 1.16 (0.99, 1.4)  | 1.16 (1.01, 1.37)     | 1.2 (0.95, 1.44)     | 0.718   |
| Lymphocyte, Median (Q1,Q3)        | 1.65 (1.2, 2.06)  | 1.67 (1.24, 2.08)     | 1.55 (1.11, 1.99)    | 0.176   |
| Neutrophil, Median (Q1,Q3)        | 3.89 (3.08, 5.47) | 3.78 (3.06, 5.14)     | 4.37 (3.22, 7.18)    | 0.008   |
| Eosinophil, Median (Q1,Q3)        | 0.14 (0.08, 0.24) | 0.15 (0.09, 0.25)     | 0.12 (0.05, 0.21)    | 0.009   |
| RBC, Mean ± SD                    | 4.2 ± 0.66        | 4.25 ± 0.67           | 4.04 ± 0.63          | 0.005   |
| Hematocrit, Median (Q1,Q3)        | 0.38 (0.34, 0.42) | 0.39 (0.35, 0.42)     | 0.38 (0.33, 0.41)    | 0.14    |
| Hemoglobin, Median (Q1,Q3)        | 125 (112, 136)    | 126 (112, 137)        | 122 (110, 135)       | 0.148   |
| Platelet, Median (Q1,Q3)          | 197 (158, 251)    | 199.5 (159, 251)      | 193 (148, 249)       | 0.299   |
| PT, Median (Q1,Q3)                | 11.6 (10.9, 12.5) | 11.5 (10.8, 12.3)     | 12 (11, 13)          | 0.002   |
| APTT, Median (Q1,Q3)              | 27.3 (25.2, 30.7) | 26.95 (24.9, 29.83)   | 28.9 (26.4, 32.3)    | < 0.001 |
| Lactate, Median (Q1,Q3)           | 1.14 (0.9, 1.54)  | 1.1 (0.88, 1.4)       | 1.4 (1.02, 2.58)     | < 0.001 |
| HCO3, Median (Q1,Q3)              | 24.8 (23.6, 25.9) | 24.8 (23.6, 25.9)     | 24.7 (23.71, 25.82)  | 0.628   |
| pH, Median (Q1,Q3)                | 7.42 (7.38, 7.46) | 7.42 (7.39, 7.45)     | 7.42 (7.37, 7.46)    | 0.864   |
| PaO2, Median (Q1,Q3)              | 265 (215.25, 309) | 265.1 (216.88, 306.2) | 264.2 (211, 315)     | 0.979   |
| PaCO2, Median (Q1,Q3)             | 37 (34, 41)       | 37 (34.21, 40.78)     | 36.17 (33.75, 42.25) | 0.887   |
| Surgical_Duration, Median (Q1,Q3) | 281 (210, 352)    | 265 (185.75, 330)     | 339 (265, 415)       | < 0.001 |
| Blood_Loss, Median (Q1,Q3)        | 300 (200, 400)    | 300 (150, 400)        | 400 (300, 600)       | < 0.001 |
| Total_Output, Median (Q1,Q3)      | 1100 (450, 2800)  | 1010 (400, 2542.5)    | 1500 (650, 3000)     | 0.015   |

|                                         |                      |                      |                       |         |
|-----------------------------------------|----------------------|----------------------|-----------------------|---------|
| Transfusion_Volume, Median (Q1,Q3)      | 154 (0, 341)         | 129 (0, 300)         | 243 (45, 440)         | < 0.001 |
| Crystalloid_Volume, Median (Q1,Q3)      | 1500 (1200, 1900)    | 1500 (1200, 1900)    | 1400 (1200, 2000)     | 0.564   |
| Total_Input, Median (Q1,Q3)             | 1887 (1300, 2454)    | 1800 (1250, 2400)    | 2070 (1583, 2670)     | 0.001   |
| Hypotension_Duration, Median (Q1,Q3)    | 304 (202, 394)       | 298 (198.5, 373)     | 347 (244, 471)        | < 0.001 |
| Hypothermia_Duration, Median (Q1,Q3)    | 237 (5, 325)         | 226 (3.5, 303)       | 291 (80, 391)         | < 0.001 |
| Low_SpO2_Duration, Median (Q1,Q3)       | 0 (0, 152)           | 0 (0, 111)           | 37 (0, 224)           | 0.005   |
| Tachycardia_Duration, Median (Q1,Q3)    | 148 (5, 298)         | 128 (1, 273.25)      | 205 (35, 355)         | < 0.001 |
| Preoperative_Creatinine, Median (Q1,Q3) | 85 (70, 98)          | 85 (71, 98.25)       | 82 (67, 96)           | 0.268   |
| eGFR, Median (Q1,Q3)                    | 79.41 (64.74, 98.08) | 79.34 (65.09, 96.88) | 79.57 (64.42, 100.64) | 0.573   |

Table S4. Baseline characteristics and outcomes of the patients in test set

| Variables                        | Total (n = 186) | 0 (n = 141) | 1 (n = 45) | p     |
|----------------------------------|-----------------|-------------|------------|-------|
| Sex, n (%)                       |                 |             |            | 0.206 |
|                                  | 0 66 (35)       | 46 (33)     | 20 (44)    |       |
|                                  | 1 120 (65)      | 95 (67)     | 25 (56)    |       |
| Insulin, n (%)                   |                 |             |            | 0.297 |
|                                  | 0 156 (84)      | 121 (86)    | 35 (78)    |       |
|                                  | 1 30 (16)       | 20 (14)     | 10 (22)    |       |
| ACEI_ARB, n (%)                  |                 |             |            | 0.395 |
|                                  | 0 129 (69)      | 95 (67)     | 34 (76)    |       |
|                                  | 1 57 (31)       | 46 (33)     | 11 (24)    |       |
| Hypertension, n (%)              |                 |             |            | 0.089 |
|                                  | 0 97 (52)       | 79 (56)     | 18 (40)    |       |
|                                  | 1 89 (48)       | 62 (44)     | 27 (60)    |       |
| Diabetes, n (%)                  |                 |             |            | 0.656 |
|                                  | 0 143 (77)      | 110 (78)    | 33 (73)    |       |
|                                  | 1 43 (23)       | 31 (22)     | 12 (27)    |       |
| Coronary_Heart_Disease,<br>n (%) |                 |             |            | 0.82  |
|                                  | 0 104 (56)      | 80 (57)     | 24 (53)    |       |
|                                  | 1 82 (44)       | 61 (43)     | 21 (47)    |       |
| Cerebral_Infarction, n (%)       |                 |             |            | 0.466 |
|                                  | 0 161 (87)      | 124 (88)    | 37 (82)    |       |
|                                  | 1 25 (13)       | 17 (12)     | 8 (18)     |       |
| Kidney_Disease, n (%)            |                 |             |            | 0.723 |
|                                  | 0 162 (87)      | 124 (88)    | 38 (84)    |       |
|                                  | 1 24 (13)       | 17 (12)     | 7 (16)     |       |
| Thrombosis, n (%)                |                 |             |            | 0.633 |
|                                  | 0 180 (97)      | 137 (97)    | 43 (96)    |       |
|                                  | 1 6 (3)         | 4 (3)       | 2 (4)      |       |
| Emphysema, n (%)                 |                 |             |            | 0.403 |
|                                  | 0 178 (96)      | 136 (96)    | 42 (93)    |       |
|                                  | 1 8 (4)         | 5 (4)       | 3 (7)      |       |
| Bronchitis, n (%)                |                 |             |            | 0.403 |
|                                  | 0 178 (96)      | 136 (96)    | 42 (93)    |       |
|                                  | 1 8 (4)         | 5 (4)       | 3 (7)      |       |
| Heart_Failure, n (%)             |                 |             |            | 0.96  |
|                                  | 0 106 (57)      | 81 (57)     | 25 (56)    |       |
|                                  | 1 80 (43)       | 60 (43)     | 20 (44)    |       |
| General_Anesthesia, n<br>(%)     |                 |             |            | 0.734 |
|                                  | 0 12 (6)        | 10 (7)      | 2 (4)      |       |
|                                  | 1 174 (94)      | 131 (93)    | 43 (96)    |       |
| ASA_12, n (%)                    |                 |             |            | 0.116 |

|                             |   |          |          |          |       |
|-----------------------------|---|----------|----------|----------|-------|
|                             | 0 | 177 (95) | 132 (94) | 45 (100) |       |
|                             | 1 | 9 (5)    | 9 (6)    | 0 (0)    |       |
| ASA_3, n (%)                |   |          |          |          | 0.074 |
|                             | 0 | 88 (47)  | 61 (43)  | 27 (60)  |       |
|                             | 1 | 98 (53)  | 80 (57)  | 18 (40)  |       |
| Colloid_Use, n (%)          |   |          |          |          | 0.016 |
|                             | 0 | 139 (75) | 112 (79) | 27 (60)  |       |
|                             | 1 | 47 (25)  | 29 (21)  | 18 (40)  |       |
| Vasopressor_Use, n (%)      |   |          |          |          | 1     |
|                             | 0 | 3 (2)    | 3 (2)    | 0 (0)    |       |
|                             | 1 | 183 (98) | 138 (98) | 45 (100) |       |
| Antihypertensive_Use, n (%) |   |          |          |          | 0.89  |
|                             | 0 | 144 (77) | 110 (78) | 34 (76)  |       |
|                             | 1 | 42 (23)  | 31 (22)  | 11 (24)  |       |
| Glucocorticoid_Use, n (%)   |   |          |          |          | 0.572 |
|                             | 0 | 152 (82) | 117 (83) | 35 (78)  |       |
|                             | 1 | 34 (18)  | 24 (17)  | 10 (22)  |       |
| Dexmedetomidine, n (%)      |   |          |          |          | 0.387 |
|                             | 0 | 162 (87) | 125 (89) | 37 (82)  |       |
|                             | 1 | 24 (13)  | 16 (11)  | 8 (18)   |       |
| Rocuronium, n (%)           |   |          |          |          | 1     |
|                             | 0 | 167 (90) | 126 (89) | 41 (91)  |       |
|                             | 1 | 19 (10)  | 15 (11)  | 4 (9)    |       |
| Atracurium, n (%)           |   |          |          |          | 0.217 |
|                             | 0 | 39 (21)  | 33 (23)  | 6 (13)   |       |
|                             | 1 | 147 (79) | 108 (77) | 39 (87)  |       |
| Ketamine, n (%)             |   |          |          |          | 0.426 |
|                             | 0 | 184 (99) | 140 (99) | 44 (98)  |       |
|                             | 1 | 2 (1)    | 1 (1)    | 1 (2)    |       |
| Epinephrine, n (%)          |   |          |          |          | 0.223 |
|                             | 0 | 9 (5)    | 5 (4)    | 4 (9)    |       |
|                             | 1 | 177 (95) | 136 (96) | 41 (91)  |       |
| Norepinephrine, n (%)       |   |          |          |          | 0.677 |
|                             | 0 | 7 (4)    | 5 (4)    | 2 (4)    |       |
|                             | 1 | 179 (96) | 136 (96) | 43 (96)  |       |
| Dopamine, n (%)             |   |          |          |          | 0.007 |
|                             | 0 | 177 (95) | 138 (98) | 39 (87)  |       |
|                             | 1 | 9 (5)    | 3 (2)    | 6 (13)   |       |
| Dobutamine, n (%)           |   |          |          |          | 1     |
|                             | 0 | 27 (15)  | 20 (14)  | 7 (16)   |       |
|                             | 1 | 159 (85) | 121 (86) | 38 (84)  |       |
| Ephedrine, n (%)            |   |          |          |          | 0.192 |
|                             | 0 | 137 (74) | 100 (71) | 37 (82)  |       |

|                               |   |          |           |         |       |
|-------------------------------|---|----------|-----------|---------|-------|
| Atropine, n (%)               | 1 | 49 (26)  | 41 (29)   | 8 (18)  | 1     |
|                               | 0 | 41 (22)  | 31 (22)   | 10 (22) |       |
| Phenylephrine, n (%)          | 1 | 145 (78) | 110 (78)  | 35 (78) | 0.455 |
|                               | 0 | 142 (76) | 110 (78)  | 32 (71) |       |
| Metaraminol, n (%)            | 1 | 44 (24)  | 31 (22)   | 13 (29) | 0.409 |
|                               | 0 | 167 (90) | 128 (91)  | 39 (87) |       |
| Esmolol, n (%)                | 1 | 19 (10)  | 13 (9)    | 6 (13)  | 0.783 |
|                               | 0 | 167 (90) | 127 (90)  | 40 (89) |       |
| Nicardipine, n (%)            | 1 | 19 (10)  | 14 (10)   | 5 (11)  | 1     |
|                               | 0 | 175 (94) | 132 (94)  | 43 (96) |       |
| Nitroglycerin, n (%)          | 1 | 11 (6)   | 9 (6)     | 2 (4)   | 0.149 |
|                               | 0 | 168 (90) | 130 (92)  | 38 (84) |       |
| Methylprednisolone, n (%)     | 1 | 18 (10)  | 11 (8)    | 7 (16)  | 0.581 |
|                               | 0 | 166 (89) | 127 (90)  | 39 (87) |       |
| Dexamethasone, n (%)          | 1 | 20 (11)  | 14 (10)   | 6 (13)  | 0.543 |
|                               | 0 | 170 (91) | 130 (92)  | 40 (89) |       |
| Mannitol, n (%)               | 1 | 16 (9)   | 11 (8)    | 5 (11)  | 1     |
|                               | 0 | 163 (88) | 124 (88)  | 39 (87) |       |
| Human_Albumin_Infusion, n (%) | 1 | 23 (12)  | 17 (12)   | 6 (13)  | 1     |
|                               | 0 | 180 (97) | 136 (96)  | 44 (98) |       |
| RBC_Transfusion, n (%)        | 1 | 6 (3)    | 5 (4)     | 1 (2)   | 0.019 |
|                               | 0 | 152 (82) | 121 (86)  | 31 (69) |       |
| Cryoprecipitate, n (%)        | 1 | 34 (18)  | 20 (14)   | 14 (31) | 0.013 |
|                               | 0 | 183 (98) | 141 (100) | 42 (93) |       |
| Succinylated_Gelatin, n (%)   | 1 | 3 (2)    | 0 (0)     | 3 (7)   | 0.05  |
|                               | 0 | 142 (76) | 113 (80)  | 29 (64) |       |
| Hydroxyethyl_Starch, n (%)    | 1 | 44 (24)  | 28 (20)   | 16 (36) | 0.247 |

|                                    |   |                         |                         |                        |       |
|------------------------------------|---|-------------------------|-------------------------|------------------------|-------|
|                                    | 0 | 182 (98)                | 139 (99)                | 43 (96)                |       |
|                                    | 1 | 4 (2)                   | 2 (1)                   | 2 (4)                  |       |
| Cardiac_Output_Monitoring, n (%)   |   |                         |                         |                        | 0.728 |
|                                    | 0 | 28 (15)                 | 20 (14)                 | 8 (18)                 |       |
|                                    | 1 | 158 (85)                | 121 (86)                | 37 (82)                |       |
| Anesthetic_Depth_Monitoring, n (%) |   |                         |                         |                        | 0.147 |
|                                    | 0 | 152 (82)                | 119 (84)                | 33 (73)                |       |
|                                    | 1 | 34 (18)                 | 22 (16)                 | 12 (27)                |       |
| Arterial_Puncture, n (%)           |   |                         |                         |                        | 0.729 |
|                                    | 0 | 11 (6)                  | 8 (6)                   | 3 (7)                  |       |
|                                    | 1 | 175 (94)                | 133 (94)                | 42 (93)                |       |
| Age, Median (Q1,Q3)                |   | 72 (69, 75)             | 72 (69, 75)             | 71 (68, 75)            | 0.325 |
| Urea, Median (Q1,Q3)               |   | 6.65 (5.3, 8.39)        | 6.6 (5.3, 8.4)          | 6.8 (5.4, 8.37)        | 0.836 |
| ALT, Median (Q1,Q3)                |   | 17 (12, 26)             | 16 (12, 25)             | 19 (13, 27)            | 0.121 |
| AST, Median (Q1,Q3)                |   | 22 (17, 26)             | 21 (16, 26)             | 23 (20, 30)            | 0.016 |
| ALT_AST, Median (Q1,Q3)            |   | 0.81 (0.65, 1.11)       | 0.81 (0.67, 1.1)        | 0.83 (0.65, 1.14)      | 0.927 |
| PLR, Median (Q1,Q3)                |   | 127.6 (95.69, 180.15)   | 117.34 (91.96, 162.43)  | 150.98 (114.4, 216.13) | 0.017 |
| NLR, Median (Q1,Q3)                |   | 2.46 (1.73, 3.84)       | 2.31 (1.74, 3.4)        | 2.75 (1.71, 7.75)      | 0.058 |
| SII, Median (Q1,Q3)                |   | 479.54 (338.94, 826.14) | 448.64 (338.78, 738.51) | 636.36 (395, 1517.93)  | 0.02  |
| Direct_Bilirubin, Median (Q1,Q3)   |   | 4.7 (3.4, 6.3)          | 4.7 (3.5, 6.1)          | 4.7 (3.1, 9.1)         | 0.746 |
| Total_Bilirubin, Median (Q1,Q3)    |   | 11.25 (7.73, 16.23)     | 11.3 (7.6, 15.9)        | 11.2 (7.9, 18.3)       | 0.517 |
| Albumin, Median (Q1,Q3)            |   | 37.95 (35.12, 40.7)     | 38.3 (35.7, 40.5)       | 37.64 (34.2, 41.1)     | 0.536 |
| Potassium, Median (Q1,Q3)          |   | 3.97 (3.77, 4.2)        | 3.99 (3.77, 4.2)        | 3.93 (3.78, 4.14)      | 0.446 |
| Sodium, Median (Q1,Q3)             |   | 140 (138, 142)          | 140 (139, 142)          | 140 (137, 142)         | 0.189 |
| Calcium, Median (Q1,Q3)            |   | 2.23 (2.16, 2.32)       | 2.23 (2.16, 2.33)       | 2.2 (2.13, 2.31)       | 0.124 |
| Cystatin_C, Median (Q1,Q3)         |   | 1.21 (1.01, 1.45)       | 1.18 (0.99, 1.45)       | 1.22 (1.11, 1.45)      | 0.33  |
| Lymphocyte, Median (Q1,Q3)         |   | 1.56 (1.15, 2.04)       | 1.61 (1.21, 2.08)       | 1.38 (0.96, 1.82)      | 0.058 |

|                                                |                        |                     |                     |         |
|------------------------------------------------|------------------------|---------------------|---------------------|---------|
| Neutrophil, Median (Q1,Q3)                     | 4.04 (3.13, 5.32)      | 4.01 (3.08, 5.08)   | 4.2 (3.3, 7.21)     | 0.062   |
| Eosinophil, Median (Q1,Q3)                     | 0.15 (0.07, 0.26)      | 0.16 (0.09, 0.29)   | 0.12 (0.05, 0.18)   | 0.013   |
| RBC, Mean $\pm$ SD                             | 4.23 $\pm$ 0.79        | 4.29 $\pm$ 0.79     | 4.06 $\pm$ 0.77     | 0.093   |
| Hematocrit, Mean $\pm$ SD                      | 0.38 $\pm$ 0.06        | 0.38 $\pm$ 0.06     | 0.36 $\pm$ 0.05     | 0.015   |
| Hemoglobin, Median (Q1,Q3)                     | 126 (113, 138)         | 129 (114, 139)      | 120 (102, 137)      | 0.024   |
| Platelet, Median (Q1,Q3)                       | 200.5 (154, 244.75)    | 197 (154, 242)      | 201 (154, 251)      | 0.871   |
| PT, Median (Q1,Q3)                             | 11.6 (10.8, 12.4)      | 11.4 (10.7, 12.2)   | 11.9 (11.4, 13)     | 0.005   |
| APTT, Median (Q1,Q3)                           | 26.95 (24.9, 30.37)    | 26.7 (24.8, 29.9)   | 28.2 (25.9, 35)     | 0.031   |
| Lactate, Median (Q1,Q3)                        | 1.14 (0.9, 1.65)       | 1.1 (0.9, 1.5)      | 1.45 (1.02, 1.9)    | 0.007   |
| HCO <sub>3</sub> , Median (Q1,Q3)              | 24.8 (23.37, 25.72)    | 24.8 (23.37, 25.75) | 24.79 (23.6, 25.72) | 0.859   |
| pH, Median (Q1,Q3)                             | 7.42 (7.38, 7.45)      | 7.41 (7.37, 7.45)   | 7.43 (7.39, 7.46)   | 0.132   |
| PaO <sub>2</sub> , Median (Q1,Q3)              | 260.4 (210.75, 306.3)  | 259.17 (208, 299.5) | 264 (224, 313.7)    | 0.519   |
| PaCO <sub>2</sub> , Median (Q1,Q3)             | 37 (33.67, 40.15)      | 37 (34, 40.33)      | 36.33 (32, 40)      | 0.417   |
| Surgical_Duration, Mean $\pm$ SD               | 275.55 $\pm$ 117.76    | 252.21 $\pm$ 104.13 | 348.71 $\pm$ 128.77 | < 0.001 |
| Blood_Loss, Median (Q1,Q3)                     | 300 (200, 395)         | 300 (100, 350)      | 300 (300, 500)      | < 0.001 |
| Total_Output, Median (Q1,Q3)                   | 867.5 (400, 2215)      | 800 (400, 1850)     | 1530 (450, 2780)    | 0.05    |
| Transfusion_Volume, Median (Q1,Q3)             | 122 (0, 286)           | 2 (0, 225)          | 245 (0, 424)        | < 0.001 |
| Crystalloid_Volume, Median (Q1,Q3)             | 1500 (1200, 1800)      | 1500 (1200, 1800)   | 1700 (1300, 2000)   | 0.047   |
| Total_Input, Median (Q1,Q3)                    | 1846 (1210.75, 2328.5) | 1734 (1200, 2100)   | 2093 (1700, 2554)   | 0.002   |
| Hypotension_Duration, Median (Q1,Q3)           | 302.5 (229.25, 410.5)  | 298 (220, 396)      | 379 (262, 446)      | 0.008   |
| Hypothermia_Duration, Median (Q1,Q3)           | 245 (81.75, 325.75)    | 234 (78, 305)       | 283 (162, 402)      | 0.017   |
| Low_SpO <sub>2</sub> _Duration, Median (Q1,Q3) | 1 (0, 112.25)          | 1 (0, 98)           | 31 (0, 143)         | 0.215   |
| Tachycardia_Duration, Median (Q1,Q3)           | 189 (20.5, 281.25)     | 180 (1, 272)        | 251 (101, 383)      | 0.012   |

|                                            |                         |                        |                        |       |
|--------------------------------------------|-------------------------|------------------------|------------------------|-------|
| Preoperative_Creatinine,<br>Median (Q1,Q3) | 89 (74.25, 101)         | 89 (75, 101)           | 86 (74, 99)            | 0.669 |
| eGFR, Median (Q1,Q3)                       | 77.46 (61.41,<br>89.03) | 77.96 (60.9,<br>89.17) | 76.55 (64.8,<br>86.64) | 0.819 |

Table S5. Baseline characteristics and outcomes of the patients in external validation cohort

| Variables                     | Total (n = 110) | 0 (n = 83) | 1 (n = 27) | p     |
|-------------------------------|-----------------|------------|------------|-------|
| Sex, n (%)                    |                 |            |            | 0.581 |
|                               | 0 54 (49)       | 39 (47)    | 15 (56)    |       |
|                               | 1 56 (51)       | 44 (53)    | 12 (44)    |       |
| Insulin, n (%)                |                 |            |            | 0.732 |
|                               | 0 97 (88)       | 74 (89)    | 23 (85)    |       |
|                               | 1 13 (12)       | 9 (11)     | 4 (15)     |       |
| ACEI_ARB, n (%)               |                 |            |            | 0.754 |
|                               | 0 74 (67)       | 57 (69)    | 17 (63)    |       |
|                               | 1 36 (33)       | 26 (31)    | 10 (37)    |       |
| Hypertension, n (%)           |                 |            |            | 0.907 |
|                               | 0 52 (47)       | 40 (48)    | 12 (44)    |       |
|                               | 1 58 (53)       | 43 (52)    | 15 (56)    |       |
| Diabetes, n (%)               |                 |            |            | 0.562 |
|                               | 0 83 (75)       | 61 (73)    | 22 (81)    |       |
|                               | 1 27 (25)       | 22 (27)    | 5 (19)     |       |
| Coronary_Heart_Disease, n (%) |                 |            |            | 0.269 |
|                               | 0 57 (52)       | 46 (55)    | 11 (41)    |       |
|                               | 1 53 (48)       | 37 (45)    | 16 (59)    |       |
| Cerebral_Infarction, n (%)    |                 |            |            | 1     |
|                               | 0 99 (90)       | 75 (90)    | 24 (89)    |       |
|                               | 1 11 (10)       | 8 (10)     | 3 (11)     |       |
| Kidney_Disease, n (%)         |                 |            |            | 0.359 |
|                               | 0 103 (94)      | 79 (95)    | 24 (89)    |       |
|                               | 1 7 (6)         | 4 (5)      | 3 (11)     |       |
| Thrombosis, n (%)             |                 |            |            | 0.252 |
|                               | 0 106 (96)      | 81 (98)    | 25 (93)    |       |
|                               | 1 4 (4)         | 2 (2)      | 2 (7)      |       |
| Emphysema, n (%)              |                 |            |            | 1     |
|                               | 0 103 (94)      | 77 (93)    | 26 (96)    |       |
|                               | 1 7 (6)         | 6 (7)      | 1 (4)      |       |
| Bronchitis, n (%)             |                 |            |            | 1     |
|                               | 0 103 (94)      | 77 (93)    | 26 (96)    |       |
|                               | 1 7 (6)         | 6 (7)      | 1 (4)      |       |
| Heart_Failure, n (%)          |                 |            |            | 0.008 |
|                               | 0 63 (57)       | 54 (65)    | 9 (33)     |       |
|                               | 1 47 (43)       | 29 (35)    | 18 (67)    |       |
| General_Anesthesia, n (%)     |                 |            |            | 1     |
|                               | 0 4 (4)         | 3 (4)      | 1 (4)      |       |
|                               | 1 106 (96)      | 80 (96)    | 26 (96)    |       |

|                             |   |          |          |          |       |
|-----------------------------|---|----------|----------|----------|-------|
| ASA_12, n (%)               |   |          |          |          | 0.57  |
|                             | 0 | 106 (96) | 79 (95)  | 27 (100) |       |
|                             | 1 | 4 (4)    | 4 (5)    | 0 (0)    |       |
| ASA_3, n (%)                |   |          |          |          | 0.321 |
|                             | 0 | 46 (42)  | 32 (39)  | 14 (52)  |       |
|                             | 1 | 64 (58)  | 51 (61)  | 13 (48)  |       |
| Colloid_Use, n (%)          |   |          |          |          | 0.604 |
|                             | 0 | 75 (68)  | 55 (66)  | 20 (74)  |       |
|                             | 1 | 35 (32)  | 28 (34)  | 7 (26)   |       |
| Vasopressor_Use, n (%)      |   |          |          |          | 0.677 |
|                             | 0 | 8 (7)    | 7 (8)    | 1 (4)    |       |
|                             | 1 | 102 (93) | 76 (92)  | 26 (96)  |       |
| Antihypertensive_Use, n (%) |   |          |          |          | 0.487 |
|                             | 0 | 81 (74)  | 63 (76)  | 18 (67)  |       |
|                             | 1 | 29 (26)  | 20 (24)  | 9 (33)   |       |
| Glucocorticoid_Use, n (%)   |   |          |          |          | 1     |
|                             | 0 | 88 (80)  | 66 (80)  | 22 (81)  |       |
|                             | 1 | 22 (20)  | 17 (20)  | 5 (19)   |       |
| Dexmedetomidine, n (%)      |   |          |          |          | 0.2   |
|                             | 0 | 86 (78)  | 62 (75)  | 24 (89)  |       |
|                             | 1 | 24 (22)  | 21 (25)  | 3 (11)   |       |
| Rocuronium, n (%)           |   |          |          |          | 0.287 |
|                             | 0 | 98 (89)  | 72 (87)  | 26 (96)  |       |
|                             | 1 | 12 (11)  | 11 (13)  | 1 (4)    |       |
| Atracurium, n (%)           |   |          |          |          | 0.756 |
|                             | 0 | 29 (26)  | 23 (28)  | 6 (22)   |       |
|                             | 1 | 81 (74)  | 60 (72)  | 21 (78)  |       |
| Ketamine, n (%)             |   |          |          |          | 0.245 |
|                             | 0 | 109 (99) | 83 (100) | 26 (96)  |       |
|                             | 1 | 1 (1)    | 0 (0)    | 1 (4)    |       |
| Epinephrine, n (%)          |   |          |          |          | 0.351 |
|                             | 0 | 15 (14)  | 13 (16)  | 2 (7)    |       |
|                             | 1 | 95 (86)  | 70 (84)  | 25 (93)  |       |
| Norepinephrine, n (%)       |   |          |          |          | 0.351 |
|                             | 0 | 15 (14)  | 13 (16)  | 2 (7)    |       |
|                             | 1 | 95 (86)  | 70 (84)  | 25 (93)  |       |
| Dopamine, n (%)             |   |          |          |          | 1     |
|                             | 0 | 105 (95) | 79 (95)  | 26 (96)  |       |
|                             | 1 | 5 (5)    | 4 (5)    | 1 (4)    |       |
| Dobutamine, n (%)           |   |          |          |          | 0.392 |
|                             | 0 | 20 (18)  | 17 (20)  | 3 (11)   |       |
|                             | 1 | 90 (82)  | 66 (80)  | 24 (89)  |       |
| Ephedrine, n (%)            |   |          |          |          | 0.387 |

|                                   |   |          |         |         |       |
|-----------------------------------|---|----------|---------|---------|-------|
|                                   | 0 | 85 (77)  | 62 (75) | 23 (85) |       |
|                                   | 1 | 25 (23)  | 21 (25) | 4 (15)  |       |
| Atropine, n (%)                   |   |          |         |         | 0.646 |
|                                   | 0 | 26 (24)  | 21 (25) | 5 (19)  |       |
|                                   | 1 | 84 (76)  | 62 (75) | 22 (81) |       |
| Phenylephrine, n (%)              |   |          |         |         | 0.685 |
|                                   | 0 | 76 (69)  | 56 (67) | 20 (74) |       |
|                                   | 1 | 34 (31)  | 27 (33) | 7 (26)  |       |
| Metaraminol, n (%)                |   |          |         |         | 0.403 |
|                                   | 0 | 102 (93) | 78 (94) | 24 (89) |       |
|                                   | 1 | 8 (7)    | 5 (6)   | 3 (11)  |       |
| Esmolol, n (%)                    |   |          |         |         | 1     |
|                                   | 0 | 105 (95) | 79 (95) | 26 (96) |       |
|                                   | 1 | 5 (5)    | 4 (5)   | 1 (4)   |       |
| Nicardipine, n (%)                |   |          |         |         | 0.634 |
|                                   | 0 | 104 (95) | 79 (95) | 25 (93) |       |
|                                   | 1 | 6 (5)    | 4 (5)   | 2 (7)   |       |
| Nitroglycerin, n (%)              |   |          |         |         | 0.448 |
|                                   | 0 | 89 (81)  | 69 (83) | 20 (74) |       |
|                                   | 1 | 21 (19)  | 14 (17) | 7 (26)  |       |
| Methylprednisolone, n (%)         |   |          |         |         | 1     |
|                                   | 0 | 98 (89)  | 74 (89) | 24 (89) |       |
|                                   | 1 | 12 (11)  | 9 (11)  | 3 (11)  |       |
| Dexamethasone, n (%)              |   |          |         |         | 1     |
|                                   | 0 | 100 (91) | 75 (90) | 25 (93) |       |
|                                   | 1 | 10 (9)   | 8 (10)  | 2 (7)   |       |
| Mannitol, n (%)                   |   |          |         |         | 0.351 |
|                                   | 0 | 95 (86)  | 70 (84) | 25 (93) |       |
|                                   | 1 | 15 (14)  | 13 (16) | 2 (7)   |       |
| Human_Albumin_Infusion<br>, n (%) |   |          |         |         | 1     |
|                                   | 0 | 107 (97) | 81 (98) | 26 (96) |       |
|                                   | 1 | 3 (3)    | 2 (2)   | 1 (4)   |       |
| RBC_Transfusion, n (%)            |   |          |         |         | 0.535 |
|                                   | 0 | 94 (85)  | 72 (87) | 22 (81) |       |
|                                   | 1 | 16 (15)  | 11 (13) | 5 (19)  |       |
| Cryoprecipitate, n (%)            |   |          |         |         | 0.595 |
|                                   | 0 | 105 (95) | 80 (96) | 25 (93) |       |
|                                   | 1 | 5 (5)    | 3 (4)   | 2 (7)   |       |
| Succinylated_Gelatin, n<br>(%)    |   |          |         |         | 0.299 |
|                                   | 0 | 79 (72)  | 57 (69) | 22 (81) |       |
|                                   | 1 | 31 (28)  | 26 (31) | 5 (19)  |       |
| Hydroxyethyl_Starch, n            |   |          |         |         | 0.252 |

|                                    |   |                         |                       |                          |       |
|------------------------------------|---|-------------------------|-----------------------|--------------------------|-------|
| (%)                                |   |                         |                       |                          |       |
|                                    | 0 | 106 (96)                | 81 (98)               | 25 (93)                  |       |
|                                    | 1 | 4 (4)                   | 2 (2)                 | 2 (7)                    |       |
| Cardiac_Output_Monitoring, n (%)   |   |                         |                       |                          | 1     |
|                                    | 0 | 19 (17)                 | 14 (17)               | 5 (19)                   |       |
|                                    | 1 | 91 (83)                 | 69 (83)               | 22 (81)                  |       |
| Anesthetic_Depth_Monitoring, n (%) |   |                         |                       |                          | 0.653 |
|                                    | 0 | 83 (75)                 | 64 (77)               | 19 (70)                  |       |
|                                    | 1 | 27 (25)                 | 19 (23)               | 8 (30)                   |       |
| Arterial_Puncture, n (%)           |   |                         |                       |                          | 1     |
|                                    | 0 | 8 (7)                   | 6 (7)                 | 2 (7)                    |       |
|                                    | 1 | 102 (93)                | 77 (93)               | 25 (93)                  |       |
| Age, Median (Q1,Q3)                |   | 72 (70, 75.75)          | 72 (70, 76)           | 72 (69, 73.5)            | 0.423 |
| Urea, Median (Q1,Q3)               |   | 6.34 (5, 8.57)          | 6.52 (5, 8.7)         | 6 (5.05, 7.2)            | 0.374 |
| ALT, Median (Q1,Q3)                |   | 16 (11, 26.75)          | 16 (11, 27)           | 16 (13, 24.5)            | 0.956 |
| AST, Median (Q1,Q3)                |   | 21 (17, 29.75)          | 21 (17, 30.5)         | 21 (16.5, 28.5)          | 0.961 |
| ALT_AST, Median (Q1,Q3)            |   | 0.79 (0.6, 1.09)        | 0.82 (0.61, 1.1)      | 0.76 (0.6, 0.95)         | 0.555 |
| PLR, Median (Q1,Q3)                |   | 136.24 (97.8, 180.6)    | 132.5 (93.05, 171.01) | 165 (112.68, 211.24)     | 0.039 |
| NLR, Median (Q1,Q3)                |   | 2.32 (1.74, 3.64)       | 2.14 (1.69, 3.21)     | 3.54 (2.31, 5.38)        | 0.004 |
| SII, Median (Q1,Q3)                |   | 472.31 (348.12, 849.97) | 417.55 (326, 737.18)  | 743.95 (446.55, 1049.88) | 0.006 |
| Direct_Bilirubin, Median (Q1,Q3)   |   | 4.45 (3.3, 6.52)        | 4.4 (3.15, 6.4)       | 4.6 (3.85, 6.45)         | 0.527 |
| Total_Bilirubin, Median (Q1,Q3)    |   | 11.65 (8, 15.88)        | 11.7 (8, 15.8)        | 11.4 (8.45, 16.25)       | 0.997 |
| Albumin, Median (Q1,Q3)            |   | 38.5 (36.7, 41.48)      | 38.4 (36.3, 41.15)    | 38.6 (36.75, 41.7)       | 0.61  |
| Potassium, Mean ± SD               |   | 4.04 ± 0.39             | 4.01 ± 0.39           | 4.13 ± 0.39              | 0.175 |
| Sodium, Median (Q1,Q3)             |   | 141 (139, 142)          | 141 (139, 142)        | 140 (138.5, 142.5)       | 0.573 |
| Calcium, Mean ± SD                 |   | 2.26 ± 0.12             | 2.26 ± 0.11           | 2.26 ± 0.15              | 0.936 |
| Cystatin_C, Median (Q1,Q3)         |   | 1.13 (0.96, 1.29)       | 1.13 (0.97, 1.27)     | 1.16 (0.94, 1.41)        | 0.61  |
| Lymphocyte, Median                 |   | 1.47 (1.19,             | 1.53 (1.24,           | 1.29 (1.09,              | 0.068 |

|                                      |                         |                      |                       |         |
|--------------------------------------|-------------------------|----------------------|-----------------------|---------|
| (Q1,Q3)                              | 1.94)                   | 1.96)                | 1.65)                 |         |
| Neutrophil, Median (Q1,Q3)           | 3.92 (3.1, 4.74)        | 3.72 (3, 4.58)       | 4.36 (3.41, 6.13)     | 0.06    |
| Eosinophil, Median (Q1,Q3)           | 0.12 (0.07, 0.22)       | 0.13 (0.09, 0.22)    | 0.09 (0.04, 0.23)     | 0.159   |
| RBC, Median (Q1,Q3)                  | 4.26 (3.9, 4.61)        | 4.29 (3.95, 4.66)    | 3.95 (3.74, 4.26)     | 0.005   |
| Hematocrit, Median (Q1,Q3)           | 0.39 (0.36, 0.42)       | 0.4 (0.36, 0.43)     | 0.36 (0.34, 0.4)      | 0.026   |
| Hemoglobin, Median (Q1,Q3)           | 126 (116, 136)          | 129 (118, 137)       | 118 (109, 128)        | 0.015   |
| Platelet, Median (Q1,Q3)             | 209.5 (166, 245.5)      | 208 (164.5, 237)     | 220 (181.5, 258)      | 0.333   |
| PT, Median (Q1,Q3)                   | 11.4 (10.9, 12.78)      | 11.4 (10.9, 12.7)    | 11.4 (10.8, 12.8)     | 0.939   |
| APTT, Median (Q1,Q3)                 | 27.55 (24.9, 30)        | 27.8 (25, 30.15)     | 26.5 (25, 29.15)      | 0.598   |
| Lactate, Median (Q1,Q3)              | 1.18 (0.9, 1.6)         | 1.1 (0.87, 1.49)     | 1.4 (1.05, 2.25)      | 0.005   |
| HCO3, Median (Q1,Q3)                 | 24.76 (23.78, 25.89)    | 24.7 (23.74, 25.7)   | 25.27 (24.08, 26.02)  | 0.453   |
| pH, Median (Q1,Q3)                   | 7.42 (7.38, 7.45)       | 7.41 (7.38, 7.45)    | 7.42 (7.38, 7.45)     | 0.892   |
| PaO2, Median (Q1,Q3)                 | 241.38 (155.45, 283.76) | 237 (137.42, 282.72) | 244.6 (219.8, 282.89) | 0.401   |
| PaCO2, Median (Q1,Q3)                | 36.9 (33.77, 42.29)     | 36.8 (33.53, 42.67)  | 37 (33.91, 41.92)     | 0.958   |
| Surgical_Duration, Median (Q1,Q3)    | 276.5 (168.75, 369)     | 233 (151, 329)       | 322 (266.5, 394)      | 0.002   |
| Blood_Loss, Median (Q1,Q3)           | 255 (150, 400)          | 200 (100, 300)       | 360 (275, 480)        | < 0.001 |
| Total_Output, Median (Q1,Q3)         | 950 (400, 2095)         | 900 (355, 2350)      | 1160 (675, 2015)      | 0.491   |
| Transfusion_Volume, Median (Q1,Q3)   | 81.5 (0, 300)           | 83 (0, 303.5)        | 60 (0, 287)           | 0.921   |
| Crystalloid_Volume, Median (Q1,Q3)   | 1400 (1200, 1839.75)    | 1400 (1200, 1800)    | 1400 (1200, 2000)     | 0.531   |
| Total_Input, Median (Q1,Q3)          | 1800 (1300, 2271)       | 1800 (1300, 2236.5)  | 1900 (1300, 2351)     | 0.821   |
| Hypotension_Duration, Median (Q1,Q3) | 284.5 (182, 372.75)     | 270 (155.5, 365.5)   | 344 (274.5, 416.5)    | 0.012   |
| Hypothermia_Duration,                | 213 (11.75,             | 183 (0, 312.5)       | 265 (202.5,           | 0.012   |

|                                            |                        |                   |                      |         |
|--------------------------------------------|------------------------|-------------------|----------------------|---------|
| Median (Q1,Q3)                             | 315.5)                 |                   | 326.5)               |         |
| Low_SpO2_Duration,<br>Median (Q1,Q3)       | 0 (0, 146)             | 0 (0, 145.5)      | 42 (0, 160)          | 0.519   |
| Tachycardia_Duration,<br>Median (Q1,Q3)    | 117 (10.75,<br>247.25) | 69 (5, 186.5)     | 251 (148,<br>360)    | < 0.001 |
| Preoperative_Creatinine,<br>Median (Q1,Q3) | 80 (68, 93)            | 79 (67, 93)       | 85 (70.5,<br>92.5)   | 0.483   |
| eGFR, Mean $\pm$ SD                        | 85.13 $\pm$ 25.84      | 86.65 $\pm$ 26.33 | 80.46 $\pm$<br>24.11 | 0.263   |
